# Supplementary material for: Distribution, removal efficiencies and environmental risk assessment of benzophenone and salicylate UV filters in WWTPs and surface waters from Romania
Source: Royal Society of Chemistry journal article supplement (doi:10.1039/d0nj05214k), 2021-01-01
Supplement: d0nj05214k1.pdf [file d0nj05214k1.pdf]

**Distribution, removal efficiencies and environmental risk assessment of benzophenone and salicylate UV filters in WWTPs and surface waters from Romania**

Florentina Laura Chiriac\*, Iuliana Paun, Florinela Pirvu, Vasile Iancu, Toma Galaon

National Research and Development Institute for Industrial Ecology – ECOIND, Drumul Podu Dambovitiei 71-73, Sector 6, 060652, Bucharest, Romania

**Table S1. Physico-chemical properties**

| Compound                                  | Abrev.   | Molecular Formula                              | Molecular weight | Solub. <sup>a,b</sup> | Log Kow <sup>b</sup> | Log Koc <sup>b</sup> | BCF <sup>b,c</sup> | Chemical structure                                                                    |
|-------------------------------------------|----------|------------------------------------------------|------------------|-----------------------|----------------------|----------------------|--------------------|---------------------------------------------------------------------------------------|
| 4-hydroxybenzophenone                     | 4HBP     | C <sub>13</sub> H <sub>10</sub> O <sub>2</sub> | 198.2            | 405.8                 | 3.07                 | 3.24                 | 6.67               | 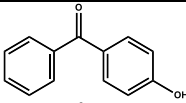   |
| 2,4-dihydroxybenzophenone                 | BP-1     | C <sub>13</sub> H <sub>10</sub> O <sub>3</sub> | 214.2            | 413.4                 | 2.96                 | 3.46                 | 5.52               |    |
| 2,3,4-trihydroxybenzophenone              | 2,3,4HBP | C <sub>13</sub> H <sub>10</sub> O <sub>4</sub> | 230.2            | 381.1                 | 2.91                 | 3.68                 | 4.98               |    |
| 2,2',4,4'-tetrahydroxybenzophenone        | BP-2     | C <sub>13</sub> H <sub>10</sub> O <sub>5</sub> | 246.2            | 398.5                 | 3.16                 | 3.88                 | 3.99               |    |
| 2-hydroxy-4-methoxybenzophenone           | BP-3     | C <sub>14</sub> H <sub>12</sub> O <sub>3</sub> | 228.2            | 68.56                 | 3.52                 | 3.10                 | 23.9               |   |
| 2,2'-dihydroxy-4-methoxybenzophenone      | BP-8     | C <sub>14</sub> H <sub>12</sub> O <sub>4</sub> | 244.2            | 52.37                 | 4.31                 | 3.32                 | 25.3               |  |
| 2-hydroxy-4-methoxy-4'-methylbenzophenone | BP-10    | C <sub>15</sub> H <sub>14</sub> O <sub>3</sub> | 242.2            | 33.3                  | 4.07                 | 3.31                 | 39.4               |  |
| Homosalate                                | HS       | C <sub>16</sub> H <sub>22</sub> O <sub>3</sub> | 262.3            | 0.42                  | 6.16                 | 4.03                 | 11080              |  |
| Ethylhexyl salicylate                     | EHS      | C <sub>15</sub> H <sub>22</sub> O <sub>3</sub> | 250.3            | 24.6                  | 5.97                 | 3.71                 | 416.7              |  |
| Benzyl salicylate                         | BS       | C <sub>14</sub> H <sub>12</sub> O <sub>3</sub> | 228.2            | 0.72                  | 4.31                 | 3.93                 | 7856               |  |

<sup>a</sup>Solub.: solubility (mg/L) in water at 25°C. <sup>b</sup>log Kow (octanol–water partition coefficient) and log Koc (soil organic carbon–water partitioning coefficient) was obtained by the Estimation Programs Interface (EPI) Suite developed by the US EPA and Syracuse Research Corp. <sup>c</sup>BCF: bioconcentration factor (L/kg wet weight).

**Table S2** Adsorption Classifications (Estimating Physical/Chemical and Environmental Fate Properties with EPI Suite™. Sustainable Futures/Pollution Prevention (P2) Framework Manual. EPA-748-B12-001. U.S. Environmental Protection Agency, OCSP)

| Log K <sub>oc</sub> | Adsorption Classifications                                                       |
|---------------------|----------------------------------------------------------------------------------|
| > 4.5               | Very strong sorption to soil / sediment, negligible migration to ground water    |
| 3.5 - 4.4           | Strong sorption to soil / sediment, negligible to slow migration to ground water |
| 2.5 - 3.4           | Moderate sorption to soil / sediment, slow migration to ground water             |
| 1.5 - 2.4           | Low sorption to soil / sediment, moderate migration to ground water              |
| < 1.5               | Negligible sorption to soil / sediment, rapid migration to ground water          |

**Table S3** Sampling points

| Locality   | Dates      | Sample Cod | WWTPs             |                                         |                 |            | Receiving Rivers |                 |            |
|------------|------------|------------|-------------------|-----------------------------------------|-----------------|------------|------------------|-----------------|------------|
|            |            |            | Served population | Average daily flow (m <sup>3</sup> /zi) | Types of sample | Sample Cod | Name             | Types of sample | Sample Cod |
| Iasi       | 14.10.2019 | WWTP1      | 793500            | 777600                                  | Influent        | I1         | Bahlui           | Upstream        | U1         |
|            | 15.10.2019 |            |                   |                                         | Effluent        | E1         |                  | Downstream      | D1         |
|            | 16.10.2019 |            |                   |                                         | Sludge          | S1         |                  |                 |            |
| Galati     | 14.10.2019 | WWTP2      | 504000            | 224640                                  | Influent        | I2         | Siret            | Upstream        | U2         |
|            | 15.10.2019 |            |                   |                                         | Effluent        | E2         |                  | Downstream      | D2         |
|            | 16.10.2019 |            |                   |                                         | Sludge          | S2         |                  |                 |            |
| Targoviste | 21.10.2019 | WWTP3      | 79600             | 47606                                   | Influent        | I3         | Ialomita         | Upstream        | U3         |
|            | 22.10.2019 |            |                   |                                         | Effluent        | E3         |                  | Downstream      | D3         |
|            | 23.10.2019 |            |                   |                                         | Sludge          | S3         |                  |                 |            |
| Glina      | 21.10.2019 | WWTP4      | 1830000           | 1028160                                 | Influent        | I4         | Somes            | Upstream        | U4         |
|            | 22.10.2019 |            |                   |                                         | Effluent        | E4         |                  | Downstream      | D4         |
|            | 23.10.2019 |            |                   |                                         | Sludge          | S4         |                  |                 |            |
| Cluj       | 28.10.2019 | WWTP5      | 706900            | 110000                                  | Influent        | I5         | Dambovita        | Upstream        | U5         |
|            | 29.10.2019 |            |                   |                                         | Effluent        | E5         |                  | Downstream      | D5         |
|            | 30.10.2019 |            |                   |                                         | Sludge          | S5         |                  |                 |            |

## 1. LC-MS/MS method development

To determine the 10 UV filters from environmental matrices, a LC-MS/MSI method previously reported by us was modified and extended.<sup>1</sup> All operational parameters of the new LC-MS / MS method required optimization.

### 1.1. Optimization of liquid chromatographic parameters

The separation of the ten organic pollutants was performed using a C18 hydrophobic column. The mobile phase composition consisted of Aq:ACN 45/55 (v/v). Liquid chromatographic separation optimization was achieved by varying the formic acid percentage in the aqueous phase, gradient program modification, chromatographic column temperature variation, different samples diluent and injection volumes. Three concentrations of formic acid were tested: Aq 0.1AF: ACN, Aq 0.15AF: ACN and Aq 0.2 AA: ACN, in a ratio of 45:55 v/v. The most intense analytical signal was obtained using the aqueous phase modified with 0.15% formic acid (Table S4).

**Table S4** Peak areas generated using different organic modifier concentration

| Compounds           | 0.1% FA | 0.15% FA | 0.2% FA |
|---------------------|---------|----------|---------|
| BP-2                | 27926   | 29120    | 28856   |
| 2,3,4HBP            | 14206   | 15715    | 15225   |
| 4HBP                | 56964   | 58975    | 58212   |
| BP-1                | 101032  | 105712   | 104354  |
| BP-8                | 502109  | 512485   | 502553  |
| BP- <sup>13</sup> C | 62097   | 62728    | 61928   |
| BP-3                | 1507659 | 1519954  | 1519128 |
| BP-10               | 2842018 | 2849891  | 2881315 |
| BS                  | 2656    | 2851     | 2857    |
| HS                  | 160452  | 159065   | 156507  |

|     |        |        |        |
|-----|--------|--------|--------|
| EHS | 228668 | 230993 | 223640 |
|-----|--------|--------|--------|

The gradient used to separate the 10 compounds was according to Table S5. This gradient generated a good peak shape with a narrow peak width.

**Table S5** The gradient program used for analytes elution

| Time (min) | ACN (%) | Flow (mL/min) | Gradient program                       |
|------------|---------|---------------|----------------------------------------|
| 0.00       | 55      | 0.200         | Analytical separation                  |
| 3.00       | 95      | 0.200         |                                        |
| 12.00      | 95      | 0.200         |                                        |
| 12.10      | 55      | 0.200         | Chromatographic column reequilibration |

Analytes ionization in the electrospray source was favored by the low flow rate of only 0.2 mL/min. The chromatographic column temperature was varied between 20-30°C. (25 °C, 30 °C and 35 °C) (Fig. S1 and Fig. S2).

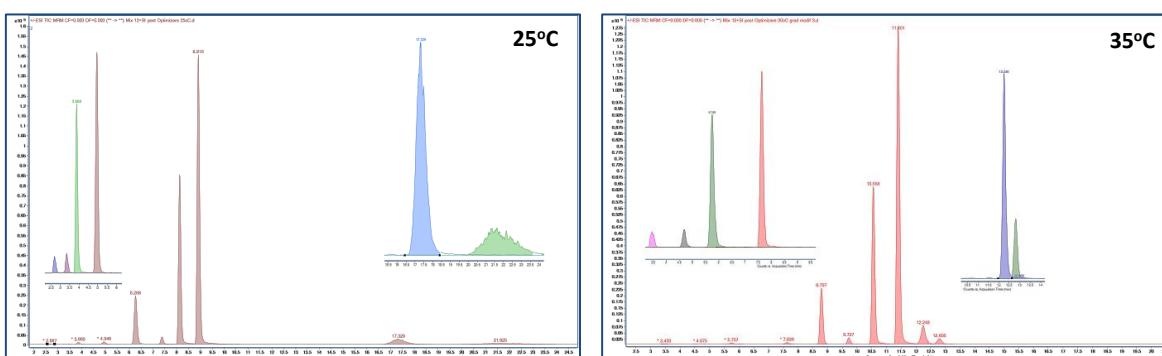

**Fig. S1** MRM chromatograms obtained at 25°C and 35°C

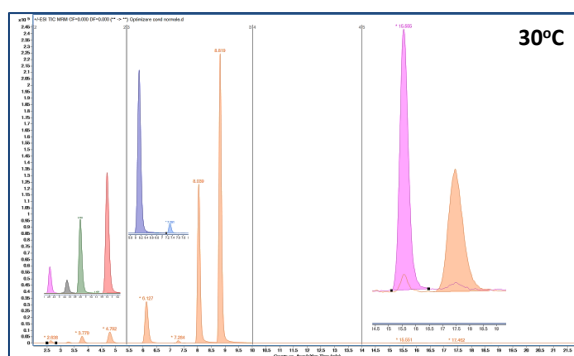

**Fig. S2** MRM chromatogram obtained at 30°C

Following these studies, it has been shown that, although a low column temperature (25°C) favors a better analytes separation, it also leads to a widening of the chromatographic peaks of the last two compounds. Studying the chromatogram obtained at 35°C, it was observed that, although for the last 2 compounds the retention time are decreasing, the separation of the 10 compounds was affected. In this context, it was proved that the temperature of 30°C favors both a better separation and narrow peak shape for all ten analytes (Fig. S2). Setting the MRM transitions for quantification of the analytes on individual time segments, except for compounds BP-10 and BS for which only one time segment was allocated, allowed a significant increase of method sensitivity (Table S6 and Fig. S5).

**Table S6** Acquisition time segment set for sensitive detection enhancement of the investigated analytes

| Time segment | Start time (min) | Scan type | Ionization mod | Div Valve | Store |
|--------------|------------------|-----------|----------------|-----------|-------|
| 1            | 0                | MRM       | ESI            | To Waste  | No    |
| 2            | 2.3              | MRM       | ESI            | To MS     | Yes   |
| 3            | 2.95             | MRM       | ESI            | To MS     | Yes   |
| 4            | 3.53             | MRM       | ESI            | To MS     | Yes   |
| 5            | 4.2              | MRM       | ESI            | To MS     | Yes   |
| 6            | 5.4              | MRM       | ESI            | To MS     | Yes   |
| 7            | 6.6              | MRM       | ESI            | To MS     | Yes   |
| 8            | 7.8              | MRM       | ESI            | To MS     | Yes   |
| 9            | 8.5              | MRM       | ESI            | To MS     | Yes   |
| 10           | 10               | MRM       | ESI            | To Waste  | No    |
| 11           | 12               | MRM       | ESI            | To MS     | Yes   |
| 12           | 14               | MRM       | ESI            | To Waste  | No    |

The Dwell time parameter was set to two values of 250 and 300 msec, respectively, generating a lower noise and implicitly a higher signal/noise ratio. To optimize the sample diluent, two diluent mixtures were tested: Aq 0.15AF:MeOH 1:1 v/v and Aq 0.15AF: ACN 60:40 v/v. The use of Aq 0.15AF:MeOH 1:1 v/v generated a solvent focus of all compounds and a slightly peak shape due to the presence of methanol (Fig. S3). In this context, it was chosen as diluent samples: Aq0.15AF:ACN 60/40.

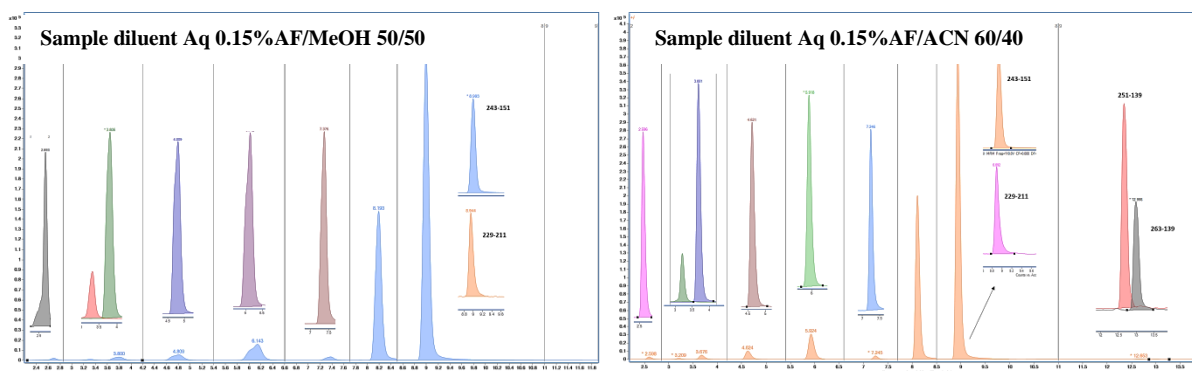**Fig. S3** The peak shapes obtained after testing both sample diluent mixtures

The injection volume was tested using 10 and 20  $\mu\text{L}$ , respectively, the latter being chosen as the final injection volume for a better method sensitivity (Fig. S4).

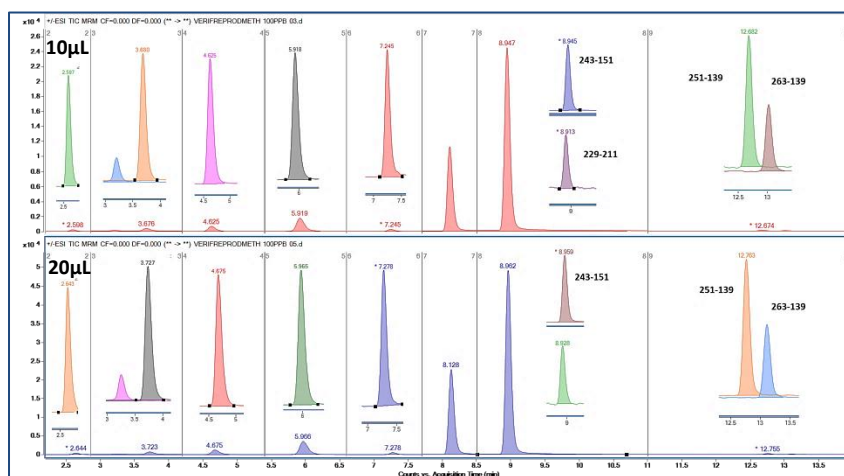**Fig. S4** Injection volume modification

The optimized conditions of the chromatographic parameters allowed the separation of the 10 analytes in less than 24 minutes. The optimal liquid-chromatographic separation (LC) parameters were:

- Chromatographic column: Luna, C18, 100Å 150 mm x 2.0 mm x 3.0 µm;
- Column temperature: 30°C
- Injection volume: 20 µl
- Mobile phase: Aq 0.15% AF/ACN
- Flow rate: 0.2 ml/min
- Sample diluent: Aq 0.15% AF/ACN = 60/40 (v/v)
- Elution mode: gradient
- Run-time: 24 minutes

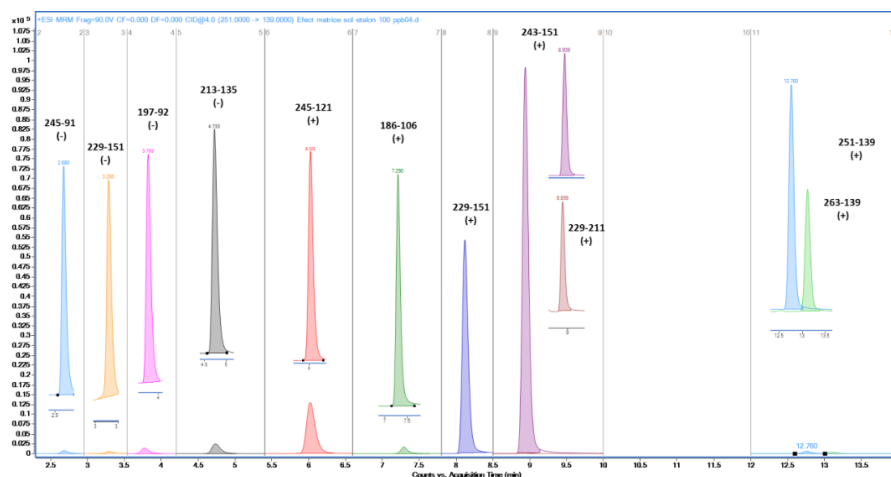

Fig. S5 Acquisition segments used to optimize the separation of the 10 analytes and the IS (100ng/mL)

## 1.2. Optimization of mass-spectrometric detection parameters (MS)

Analytes were determined by ESI-LC-MS/MS either in positive or negative mode by multiple reaction monitoring (MRM). All parameters of the quadrupole triple MS detector (QQQ) have been optimized: fragmentor voltage, collision energy (CE), cell accelerator voltage, quadrupoles resolution (MS1, MS2 Res), acquisition time per MRM transition (dwell time) and capillary voltage. For the optimization process, an analyte mixture solution with a concentration of 10 mg/L and an injection volume of 2 µL was used. It was chosen the mass spectrometric parameters which generated the highest sensitivity (peak area and signal-to-noise ratio) for the studied compounds. The fragmentor voltage values were varied between 90 and 160 volts (Fig. S6).

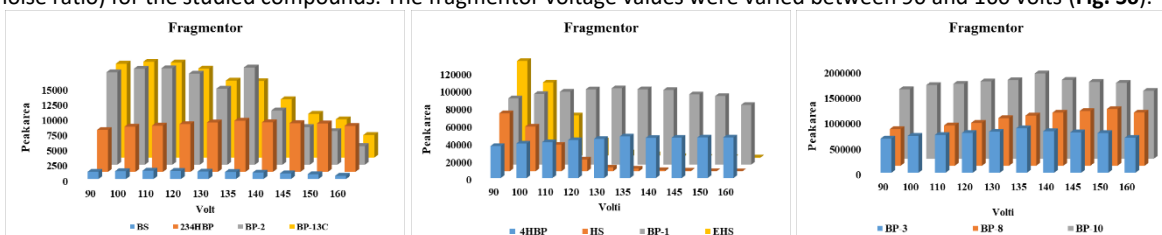

Fig. S6 Peak area values during the fragmentor voltage optimization

For the collision energy, different values were tested around the one at which the MRM transitions were determined (Table S7).

**Table S7** Peak area variation during the Collision energy

| Compounds            | Collision energy values |         |         |         |        |
|----------------------|-------------------------|---------|---------|---------|--------|
|                      | 20                      | 25      | 30      | 35      | 40     |
| 234HBP               | 1683                    | 14771   | 8237    | 3467    | 1199   |
| BP-1                 | 5                       | 10      | 15      | 20      | 25     |
|                      | 9812                    | 3358    | 79629   | 113361  | 90596  |
| 4HBP                 | 25                      | 30      | 35      | 40      | 45     |
|                      | 16568                   | 34660   | 44153   | 48547   | 43762  |
| BP-2                 | 15                      | 20      | 25      | 30      | 35     |
|                      | 3931                    | 9414    | 14269   | 19626   | 19296  |
| BP-10                | 20                      | 25      | 30      | 35      | 40     |
|                      | 2161298                 | 2025529 | 1487092 | 1067071 | 614398 |
| BS                   | 10                      | 15      | 20      | 25      | 30     |
|                      | 1337                    | 1574    | 953     | 682     | 244    |
| BP-3                 | 20                      | 25      | 30      | 35      | 40     |
|                      | 1137988                 | 1083214 | 832501  | 541978  | 304764 |
| BP - <sup>13</sup> C | 5                       | 7       | 10      | 13      | 15     |
|                      | 2993                    | 5688    | 12855   | 16193   | 18917  |
| BP-8                 | 20                      | 25      | 30      | 35      | 40     |
|                      | 509189                  | 484825  | 261190  | 317111  | 208193 |
| EHS                  | 3                       | 4       | 5       | 6       | 7      |
|                      | 4031                    | 4091    | 3699    | 3853    | 3865   |
| HS                   | 3                       | 4       | 5       | 6       | 7      |
|                      | 2821                    | 2845    | 2934    | 2694    | 2778   |

The capillary voltage was varied between 3000 and 5500V (Fig. S7), the acceleration voltage in the collision cell between 0 and 6V (Fig. S8) and the nebulizer pressure between 40-50 psi (Fig. S9).

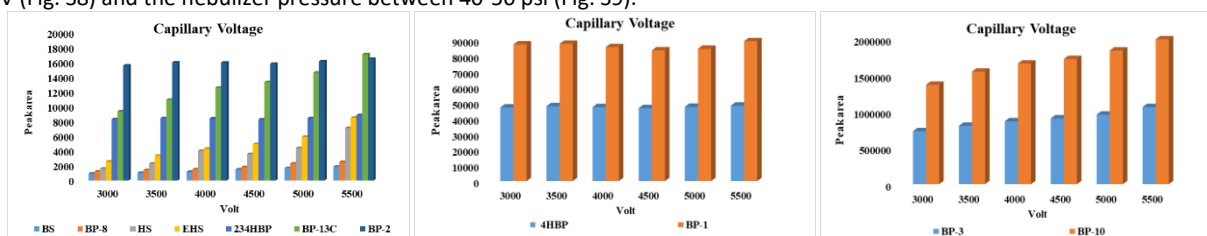**Fig. S7** Peak area values during the capillary voltage optimization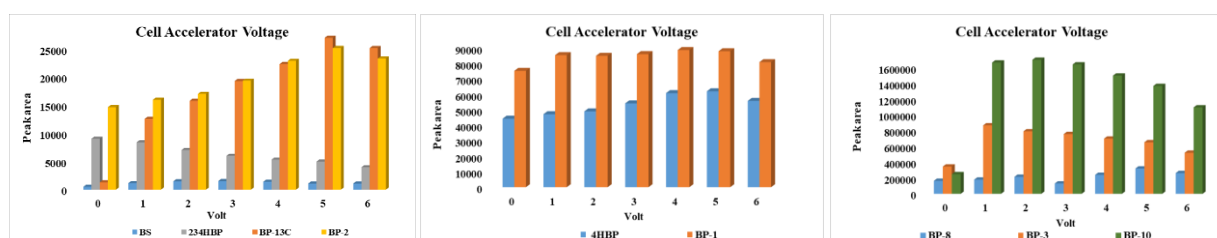**Fig. S8** Peak area values during the cell accelerator voltage optimization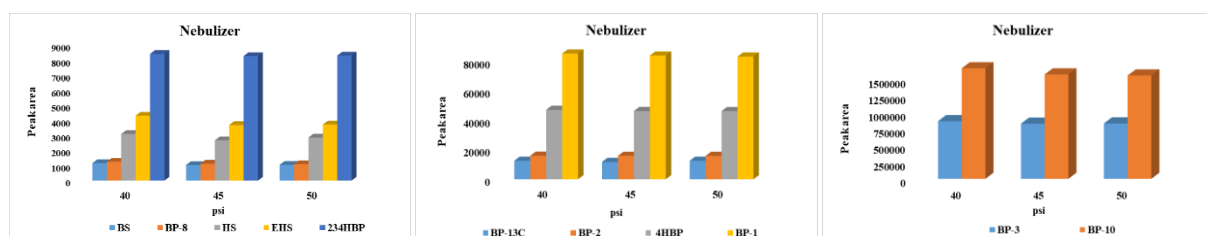**Fig. S9** Peak area values during the nebulizer pressure optimization

Following the MS detection optimization procedure, the parameters that generated maximum sensitivity for all analyzed compounds were chosen. The optimized values are given in Table S8:

- Ionization mode: Electrospray negativ ESI(-) and positive ESI (+)
- Drying gas temperature: 300°C
- Drying gas flow: 9 L/min
- Nebulizer pressure: 40 psi
- MSmode: Multiple Reaction Monitoring (MRM)

**Table S8** LC-MS/MS mass transitions, retention times and operational MS parameters for target analytes and mass-labeled standard

| Analyte             | Retention time (min) | MRM Transition | Fragmentor Voltage (V) | Collision Energy (V) | Cell Accelerator Voltage (V) | Dwell time (msec) | ESI mode |
|---------------------|----------------------|----------------|------------------------|----------------------|------------------------------|-------------------|----------|
| BP-2                | 2.65                 | 245→91.0       | 110                    | 30                   | 5                            | 250               | Negative |
| 234HBP              | 3.26                 | 229→151        | 135                    | 25                   | 0                            | 250               | Negative |
| 4HBP                | 3.72                 | 197→92.0       | 150                    | 45                   | 5                            | 250               | Negative |
| BP-1                | 4.68                 | 213→135        | 130                    | 20                   | 4                            | 250               | Negative |
| BP-8                | 5.97                 | 245→121        | 150                    | 20                   | 5                            | 250               | Pozitive |
| BP- <sup>13</sup> C | 7.27                 | 184→106        | 100                    | 15                   | 5                            | 250               | Pozitive |
| BP-3                | 8.12                 | 229→151        | 135                    | 20                   | 1                            | 250               | Pozitive |
| BP-10               | 8.91                 | 243→151        | 130                    | 20                   | 2                            | 100               | Pozitive |
| BS                  | 8.94                 | 229→211        | 115                    | 15                   | 3                            | 300               | Pozitive |
| EHS                 | 12.75                | 251→139        | 90                     | 4                    | 5                            | 300               | Pozitive |
| HS                  | 13.10                | 263→139        | 90                     | 5                    | 5                            | 300               | Pozitive |

## 2. Solid phase extraction optimization

Aqueous samples were concentrated and cleaned up by a solid phase extraction (SPE) system, SPE AutoTrace 280 Thermo Scientific Dionex. The recovery efficiency of the 10 UV filters and the internal standard was evaluated using two types of cartridges: Strata X 30 µm cartridges with polymeric stationary phase and Strata C18 with hydrophobic stationary phase. The cartridges were preconditioned with 10 mL methanol and 10 mL Milli-Q water. The samples were loaded into cartridges at a flow rate of 5 mL/min. The cartridges were washed with 10 mL Milli-Q water at a flow rate of 20 mL/min. The adsorbent phase was dried under a stream of nitrogen for 30 minutes. The analytes were eluted with 2 x 5 mL methanol at a flow rate of 5 mL/min. The extracts were concentrated to dryness under a gentle nitrogen stream, at 60°C, taken up in a volume of 1.0 mL with Aq 0.15% AF/ACN in a ratio of 60/40 (v/v) binary mixture and analyzed by LC-MS/MS. Recovery yields were higher than 87.7% for hydrophobic C18 cartridges (Table S9).

**Table S9** Recovery yields determined following the use of Strata X and Strata C18 SPE cartridges

| Analytes            | Recovery yields % |            |
|---------------------|-------------------|------------|
|                     | Strata X          | Strata C18 |
| BP-2                | 66.0              | 88.9       |
| 234HBP              | 61.0              | 84.9       |
| 4HBP                | 77.8              | 93.3       |
| BP-1                | 66.9              | 99.3       |
| BP-8                | 64.8              | 96.9       |
| BP- <sup>13</sup> C | 69.9              | 91.1       |
| BP-3                | 67.1              | 102.1      |
| BP-10               | 70.9              | 95.2       |
| BS                  | 48.4              | 97.7       |
| EHS                 | 67.7              | 101.3      |
| HS                  | 68.2              | 87.7       |

### 3. Method Validation

#### 3.1. Linearity

The linear regressions obtained for the 10 analytes were plotted between 1 ÷ 100 µg/L and exhibit correlation coefficients higher than 0.998.

#### 3.2. Selectivity / Specificity of the method

To test the selectivity of the method, the sample preparation procedure was applied to a water sample that did not contain selected analytes. The sample was subjected to the SPE extraction procedure in triplicate. It was proved that none of the analytes have been observed at the characteristic retention times and that there are no interferences on their MRM transitions. Thus, the developed method could be considered specific/selective. (Fig. S10).

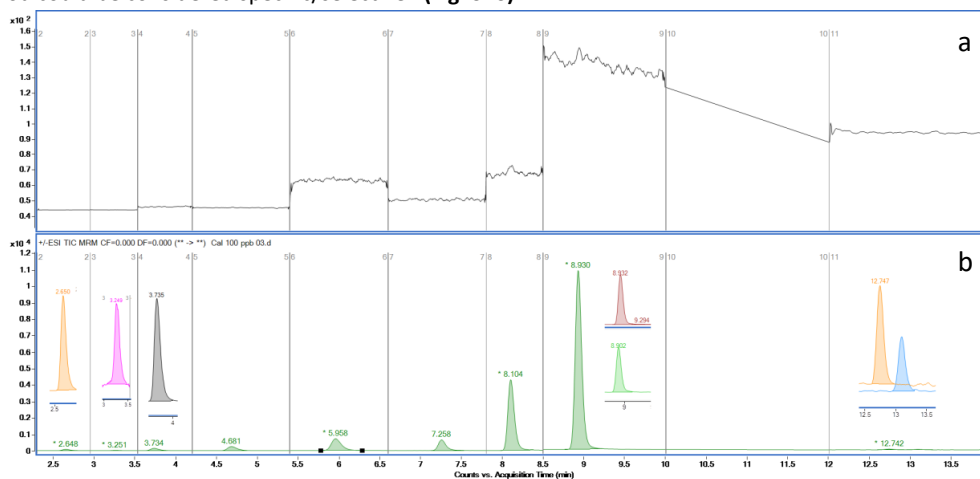

Fig. S10 Chromatogram of a water sample that does not contain interferences on the MRM transitions of the compounds of interest (a) versus the chromatogram of a standard solution of 100 ng/mL (b)

#### 3.3. Precision

The accuracy of the method was determined by evaluating the repeatability (instrument repeatability, analysis repeatability) and intermediate precision, both for surface water, wastewater and sludge matrices. The results are summarized in Fig. S11 and Table S10.

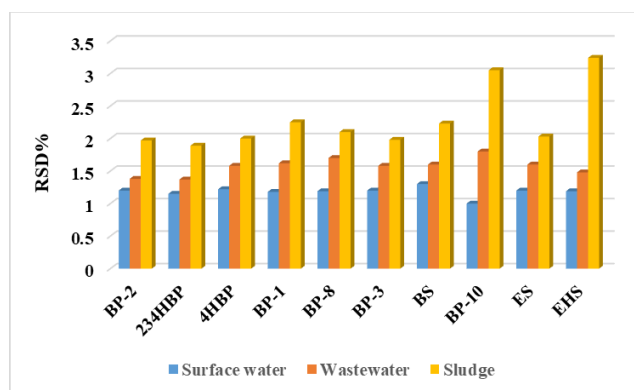

Fig. S11 The results obtained for the instrument repeatability for the ten analytes at a concentration of 10 ng/mL

Regarding the analysis repeatability and the intermediate precision, the RSD% values obtained were higher, but were within the acceptability limit for an LC-MS method of 15%. The analysis repeatability was determined at two concentration levels, 10 and 50 ng/L, respectively, for all three types of matrices (surface water, wastewater and sewage sludge samples), concentration found after extraction of controlled contaminated samples and taken up in 1 mL of sample solvent. The values obtained for the relative standard deviation (RSD%) are presented in Table S10. The method accuracy was evaluated for all three matrices, in triplicate, after they were contaminated with 1 mL of standard solution of concentration of 10 ng/mL and 50 ng/mL, respectively. The values obtained were below  $\pm 10\%$  of the theoretical value (Table S10).



**Table S10** The RSD values obtained for the method repeatability, intermediate precision and accuracy

| Compound<br>s | Surface water    |                  |          |                  |                  |          | Wastewater       |                  |          |                  |                  |          |
|---------------|------------------|------------------|----------|------------------|------------------|----------|------------------|------------------|----------|------------------|------------------|----------|
|               | 10ng/mL          |                  |          | 50ng/L           |                  |          | 10ng/mL          |                  |          | 50ng/L           |                  |          |
|               | RSD <sub>r</sub> | RSD <sub>R</sub> | Accuracy |
| BP-2          | 1.88             | 9.23             | -3.90    | 1.65             | 8.76             | -2.95    | 3.09             | 12.25            | -1.42    | 2.66             | 11.95            | 3.90     |
| 234HBP        | 1.65             | 8.95             | 4.72     | 1.37             | 8.15             | 5.66     | 2.58             | 12.63            | 5.19     | 2.12             | 11.73            | 4.72     |
| 4HBP          | 1.44             | 8.66             | 3.27     | 1.39             | 7.95             | 4.86     | 2.31             | 11.96            | 3.40     | 1.97             | 10.41            | 2.13     |
| BP-1          | 1.65             | 9.18             | 2.41     | 1.48             | 8.78             | 3.25     | 2.44             | 12.58            | 3.73     | 2.02             | 10.95            | 4.80     |
| BP-8          | 1.76             | 9.23             | 0.03     | 1.53             | 8.93             | 1.39     | 3.02             | 10.83            | 3.34     | 2.45             | 9.97             | 5.56     |
| BP-3          | 1.83             | 9.45             | 1.38     | 1.69             | 9.02             | 2.68     | 3.18             | 10.95            | 4.22     | 2.58             | 10.02            | 3.01     |
| BS            | 1.81             | 10.12            | 0.85     | 1.56             | 9.44             | 3.76     | 2.96             | 12.49            | 5.19     | 2.31             | 11.75            | 4.72     |
| BP-10         | 1.73             | 9.67             | -0.06    | 1.49             | 9.05             | 5.57     | 2.45             | 11.66            | 6.53     | 1.83             | 10.75            | 6.23     |
| ES            | 1.98             | 10.53            | 5.10     | 1.71             | 9.76             | 7.84     | 3.21             | 12.88            | 10.20    | 2.64             | 11.23            | 10.36    |
| HS            | 1.92             | 10.61            | -2.40    | 1.73             | 9.83             | -1.29    | 3.01             | 12.73            | 7.56     | 2.41             | 11.49            | 8.12     |

| Compounds | Sludge           |                  |          |                  |                  |          |
|-----------|------------------|------------------|----------|------------------|------------------|----------|
|           | 10ng/g           |                  |          | 50ng/g           |                  |          |
|           | RSD <sub>r</sub> | RSD <sub>R</sub> | Accuracy | RSD <sub>r</sub> | RSD <sub>R</sub> | Accuracy |
| BP-2      | 7.15             | 14.25            | 8.72     | 5.88             | 12.71            | 9.44     |
| 234HBP    | 5.96             | 12.27            | 7.25     | 5.21             | 11.16            | 10.14    |
| 4HBP      | 5.89             | 12.83            | 4.82     | 4.96             | 11.85            | 8.51     |
| BP-1      | 6.38             | 14.17            | 5.49     | 4.17             | 13.05            | 10.13    |
| BP-8      | 7.44             | 13.83            | 6.17     | 6.11             | 12.41            | 7.25     |
| BP-3      | 7.75             | 14.59            | 8.23     | 5.87             | 12.07            | 8.77     |
| BS        | 5.83             | 14.22            | 7.41     | 5.01             | 13.15            | 6.48     |
| BP-10     | 5.91             | 13.68            | 9.22     | 5.23             | 11.18            | 6.12     |
| ES        | 7.92             | 14.89            | 8.94     | 6.82             | 12.23            | 7.95     |
| HS        | 6.78             | 14.23            | 10.21    | 4.93             | 13.49            | 8.11     |

### 3.4. Recovery

The recovery was calculated following the application of the extraction procedure on a number of 3 surface water, wastewater and sludge samples. Samples were spiked with a known concentration of each native compound and internal standard (50 ng/mL). The data obtained for the absolute recovery efficiency are presented in Table S11.

**Table S11.** Recovery values obtained after solid phase extraction for all three matrices

| Compounds | Recovery, % |            |          |          |        |
|-----------|-------------|------------|----------|----------|--------|
|           | Upstream    | Downstream | Effluent | Influent | Sludge |
| BP-2      | 82.7        | 80.7       | 74.2     | 63.1     | 63.9   |
| 234HBP    | 81.4        | 79.4       | 73.6     | 66.5     | 76.1   |
| 4HBP      | 90.0        | 75.8       | 81.8     | 68.4     | 64.3   |
| BP-1      | 101.2       | 86.7       | 105.4    | 104      | 79.8   |
| BP-8      | 89.5        | 83.3       | 101.9    | 70.2     | 69.1   |
| BP-3      | 108.7       | 93.3       | 90.7     | 78.3     | 85.2   |
| BS        | 99.8        | 94.1       | 90.1     | 64.5     | 68.9   |
| BP-10     | 90.2        | 82.5       | 91.4     | 65.7     | 74.1   |
| ES        | 92.7        | 91.4       | 93.8     | 78.2     | 65.0   |
| HS        | 103.4       | 93.7       | 98.5     | 81.8     | 72.6   |
| EHS       | 86.8        | 83.1       | 76.2     | 72.5     | 70.0   |

### 3.5. Sensitivity. Detection and quantification limit

Detection (LOD) and quantification (LOQ) limits were determined by injecting lower solutions until the experimentally determined signal-to-noise ratio was 3 (LOD) and 10 (LOQ), respectively. The values are given in Table S12.

**Table S12** LOD and LOQ values

| Compounds | IQL, µg/L | Surface water, ng/L |      |            |      | Wastewater, ng/L |      |          |      | Sludge ng/g dw |       |
|-----------|-----------|---------------------|------|------------|------|------------------|------|----------|------|----------------|-------|
|           |           | Upstream            |      | Downstream |      | Effluent         |      | Influent |      | LOD            | LOQ   |
|           |           | LOD                 | LOQ  | LOD        | LOQ  | LOD              | LOQ  | LOD      | LOQ  |                |       |
| BP-2      | 0.19      | 0.35                | 1.15 | 0.35       | 1.18 | 0.77             | 2.56 | 0.91     | 3.02 | 3.22           | 10.72 |
| 234THBP   | 0.15      | 0.28                | 0.92 | 0.28       | 0.94 | 0.61             | 2.03 | 0.68     | 2.26 | 3.07           | 9.21  |
| 4HBP      | 0.12      | 0.20                | 0.68 | 0.24       | 0.81 | 0.45             | 1.50 | 0.54     | 1.80 | 2.61           | 7.84  |
| BP-1      | 0.16      | 0.24                | 0.81 | 0.28       | 0.95 | 0.47             | 1.56 | 0.47     | 1.58 | 2.30           | 6.89  |
| BP-8      | 0.04      | 0.06                | 0.20 | 0.06       | 0.21 | 0.10             | 0.35 | 0.15     | 0.51 | 2.34           | 7.01  |
| BP-3      | 0.35      | 0.37                | 1.22 | 0.41       | 1.38 | 8.86             | 2.87 | 1.05     | 3.50 | 3.57           | 11.89 |
| BP-10     | 0.10      | 0.15                | 0.51 | 0.16       | 0.54 | 0.34             | 1.13 | 0.48     | 1.59 | 2.66           | 7.98  |
| BS        | 0.19      | 0.31                | 1.05 | 0.34       | 1.15 | 0.62             | 2.07 | 0.87     | 2.91 | 3.47           | 11.55 |
| HS        | 0.49      | 0.49                | 1.64 | 0.51       | 1.68 | 0.97             | 3.23 | 1.28     | 4.28 | 5.95           | 19.81 |
| EHS       | 0.52      | 0.45                | 1.51 | 0.53       | 1.77 | 0.98             | 3.28 | 1.33     | 4.42 | 6.53           | 21.74 |

### 3.6. Matrix effects

Matrix effect was evaluated by the post-extraction addition method for both liquid and solid matrices. The extracts obtained were contaminated with a known concentration of analyte mixture (50 ng/mL) and internal standard. Matrix effects were evaluated by comparing the differences between responses obtained for non-spiked and spiked extracts with those measured for a standard solution of the same concentration. The matrix effects were calculated as the ratio between the analytical signal generated by the analyte in the sample and the signal generated by the analyte in the standard solution, expressed in %ME (Equation S1):

$$ME = \frac{A_S - A_N}{A_0} \times 100 \quad , \quad \text{Equation S1}$$

where  $A_S$  is the peak area of analyte compounds in the sample extracts spiked with standard solution,  $A_N$  is the peak area of analyte compounds in the corresponding sample extracts spiked with standard solution,  $A_0$  is the peak area of analyte compounds in the standard spiking solution.

%ME = 100% - no matrix effects

%ME < 100% - ionization suppression

%ME > 100% - ionization enhancement

The data obtained for the matrix effect for each analyte are presented in Table S13.

**Table S13** Matrix effect values obtained for the target analytes in all three matrices

| Compounds           | Matrix effect, % |            |          |          |        |
|---------------------|------------------|------------|----------|----------|--------|
|                     | Upstream         | Downstream | Effluent | Influent | Sludge |
| BP-2                | 86               | 81         | 75       | 71       | 67     |
| 234HBP              | 91               | 82         | 77       | 70       | 66     |
| 4HBP                | 93               | 78         | 72       | 71       | 66     |
| BP-1                | 103              | 90         | 109      | 105      | 83     |
| BP-8                | 97               | 95         | 112      | 77       | 72     |
| BP- <sup>13</sup> C | 115              | 106        | 101      | 82       | 103    |
| BP-3                | 105              | 97         | 94       | 72       | 64     |
| BP-10               | 92               | 84         | 86       | 72       | 64     |
| BS                  | 97               | 93         | 100      | 86       | 77     |
| EHS                 | 107              | 103        | 105      | 88       | 75     |
| HS                  | 93               | 98         | 91       | 79       | 70     |

The values determined for the three types of matrices generated either a suppression of the signal or an erroneous enhancement of it, depending on both the nature of the analyte and the complexity of the respective matrix. (Fig. S12).

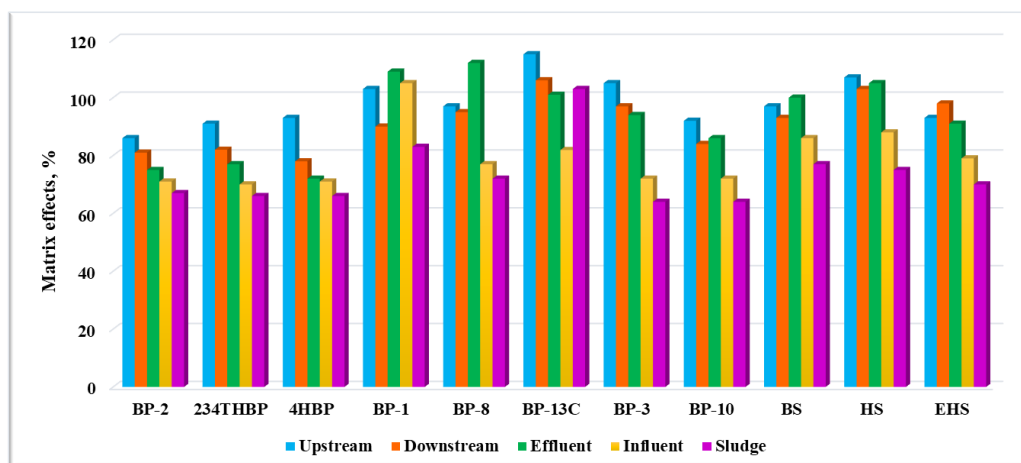

Fig. S12 Assesment for matrix effects for surface water, wastewater and sludge matrices

Table S14 Concentration values obtained for all environmental water samples (ng/L) and sewage sludge samples (ng/g, su)

| Samples | BP-2 | 234THBP | 4HBP  | BP-1 | BP-8 | BP-3 | BP-10 | BS   | HS   | EHS  |
|---------|------|---------|-------|------|------|------|-------|------|------|------|
| U1      | 10.7 | 39.9    | 42.0  | 64.9 | 60.3 | 13.2 | 9.71  | ND   | ND   | 125  |
| U2      | ND   | ND      | ND    | 9.27 | ND   | 6.81 | 0.75  | ND   | ND   | 10.4 |
| U3      | 10.7 | ND      | 44.6  | 78.8 | 53.0 | 52.4 | 8.23  | ND   | ND   | ND   |
| U4      | 2.13 | ND      | 7.35  | 17.4 | 10.6 | 3.03 | 1.75  | 2.25 | ND   | ND   |
| U5      | ND   | ND      | 1.58  | 9.51 | 4.38 | 4.04 | 0.62  | 2.13 | ND   | 31.8 |
| D1      | 3.00 | 16.0    | 4.00  | 11.0 | 14.0 | 2.63 | 0.56  | ND   | 14.0 | 139  |
| D2      | 14.1 | ND      | 11.22 | 94.2 | 16.5 | 17.7 | 1.10  | ND   | ND   | 12.0 |
| D3      | 28.1 | 19.2    | 159   | 206  | 108  | 18.7 | 17.1  | ND   | ND   | ND   |
| D4      | 2.81 | 15.4    | 10.4  | 66.9 | 12.0 | 5.69 | 2.03  | ND   | ND   | 47.0 |
| D5      | ND   | 7.68    | 3.48  | 7.31 | ND   | 2.67 | <LOQ  | 3.45 | ND   | 43.5 |
| I1      | 40.9 | 88.7    | 104   | 2784 | 53.8 | 37.6 | 122   | 62.1 | 70.8 | 370  |
| I2      | 16.4 | 88.7    | 42.7  | 1874 | 29.5 | 35.6 | 3.53  | 23.8 | 212  | 375  |
| I3      | 32.7 | 88.7    | 97.6  | 2712 | 131  | 101  | 51.2  | 8.06 | ND   | ND   |
| I4      | 8.18 | 1108    | 19.5  | 695  | 38.8 | 29.9 | 4.36  | 22.5 | 51.9 | 59.9 |
| I5      | 13.1 | 142     | 14.6  | 637  | 32.9 | 32.8 | 4.45  | 56.1 | 75.5 | 257  |
| E1      | 11.8 | 42.5    | 25.9  | 60.6 | 37.4 | 12.5 | 7.02  | 9.75 | 42.3 | 217  |
| E2      | 7.84 | ND      | 14.4  | 39.4 | 8.35 | 6.62 | <LOQ  | ND   | ND   | 44.0 |
| E3      | 23.5 | ND      | 77.8  | 105  | 12.7 | 10.3 | 15.7  | 6.10 | ND   | ND   |
| E4      | 4.70 | 25.5    | 16.1  | 181  | 18.3 | 7.88 | 1.15  | 19.3 | 21.2 | ND   |
| E5      | 4.70 | ND      | 12.7  | 23.0 | 21.3 | 23.0 | <LOQ  | 11.7 | 50.8 | 219  |
| S1      | <LOQ | <LOQ    | 13.7  | 6.49 | ND   | 38.8 | <LOQ  | 1381 | 308  | 444  |
| S2      | <LOQ | <LOQ    | 13.7  | 14.9 | <LOQ | 302  | 15.4  | 643  | 1035 | 688  |
| S3      | <LOQ | <LOQ    | 14.2  | 18.4 | <LOQ | 59.4 | 11.4  | 710  | 645  | 377  |
| S4      | <LOQ | <LOQ    | 19.8  | 39.8 | <LOQ | 75.9 | <LOQ  | 1395 | 319  | 203  |
| S5      | <LOQ | <LOQ    | 173   | 15.9 | <LOQ | 359  | 15.8  | 766  | 719  | 347  |

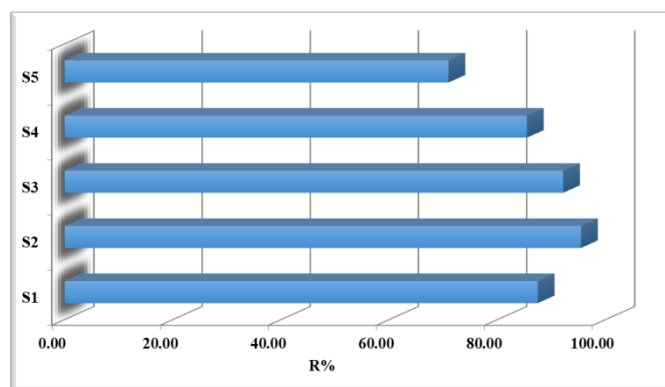

Fig. S13 Removal efficiencies of the analyzed WWTPs

Table S15 Daily consumption levels of UV-Fliters (mg/day/1000 people)

|    | maximum daily consumption levels (mg/day/1000 people) |         |      |      |      |      |       |    |    |     |
|----|-------------------------------------------------------|---------|------|------|------|------|-------|----|----|-----|
|    | BP-2                                                  | 234THBP | 4HBP | BP-1 | BP-8 | BP-3 | BP-10 | BS | HS | EHS |
| I1 | 40                                                    | 87      | 102  | 2728 | 53   | 37   | 119   | 61 | 69 | 362 |
| I2 | 7                                                     | 40      | 19   | 835  | 13   | 16   | 2     | 11 | 95 | 167 |
| I3 | 20                                                    | 53      | 58   | 1622 | 78   | 60   | 31    | 5  | 0  | 0   |
| I4 | 5                                                     | 623     | 11   | 390  | 22   | 17   | 2     | 13 | 29 | 34  |
| I5 | 2                                                     | 22      | 2    | 99   | 5    | 5    | 1     | 9  | 12 | 40  |

Table S16 Total environmental emission of UV-Fliters (mg/day/1000 people)

|    | BP-2 | 234THBP | 4HBP | BP-1 | BP-8 | BP-3 | BP-10 | BS | HS | EHS |
|----|------|---------|------|------|------|------|-------|----|----|-----|
| E1 | 12   | 42      | 25   | 59   | 37   | 12   | 7     | 10 | 41 | 213 |
| E2 | 3    | 0       | 6    | 18   | 4    | 3    | 0     | 0  | 0  | 20  |
| E3 | 14   | 0       | 47   | 63   | 8    | 6    | 9     | 4  | 0  | 0   |
| E4 | 3    | 14      | 9    | 102  | 10   | 4    | 1     | 11 | 12 | 0   |
| E5 | 1    | 0       | 2    | 4    | 3    | 4    | 0     | 2  | 8  | 34  |

Table S17 Spearman correlation between Upstream-Downstream and Effluent-Downstream resulted values

|    | D1              | D2             | D3             | D4             | D5             |
|----|-----------------|----------------|----------------|----------------|----------------|
| U1 | 0.615(p=0.058)  |                |                |                |                |
| E1 | 0.900(p=0.0004) |                |                |                |                |
| U2 |                 | 0.585(p=0.076) |                |                |                |
| E2 |                 | 0.733(p=0.016) |                |                |                |
| U3 |                 |                | 0.824(p=0.003) |                |                |
| E3 |                 |                | 0.824(p=0.006) |                |                |
| U4 |                 |                |                | 0.321(p=0.365) |                |
| E4 |                 |                |                | 0.273(p=0.446) |                |
| U5 |                 |                |                |                | 0.430(p=0.209) |
| E5 |                 |                |                |                | 0.297(p=0.405) |

**Table S18** Spearman correlation coefficients of organic UV filters in Upstream samples

|         |                | S1 (n=5) |         |        |        |        |        |        |        |        |
|---------|----------------|----------|---------|--------|--------|--------|--------|--------|--------|--------|
|         |                | BP-2     | 234THBP | 4HBP   | BP-1   | BP-8   | BP-3   | BP-10  | BS     | HS     |
| 234THBP | Spearman Corr. | 0.895    |         |        |        |        |        |        |        |        |
|         | p value        | 0.0404   |         |        |        |        |        |        |        |        |
| 4HBP    | Spearman Corr. | 0.895    | 0.838   |        |        |        |        |        |        |        |
|         | p value        | 0.0404   | 0.0765  |        |        |        |        |        |        |        |
| BP-1    | Spearman Corr. | 0.984    | 0.838   | 1.000  |        |        |        |        |        |        |
|         | p value        | 0.0025   | 0.0765  | 0.0000 |        |        |        |        |        |        |
| BP-8    | Spearman Corr. | 0.984    | 0.919   | 0.968  | 0.968  |        |        |        |        |        |
|         | p value        | 0.0025   | 0.0274  | 0.0070 | 0.0070 |        |        |        |        |        |
| BP-3    | Spearman Corr. | 0.886    | 0.886   | 0.870  | 0.870  | 0.838  |        |        |        |        |
|         | p value        | 0.0451   | 0.6325  | 0.0550 | 0.0550 | 0.0765 |        |        |        |        |
| BP-10   | Spearman Corr. | 0.984    | 0.984   | 0.935  | 0.935  | 0.968  | 0.870  |        |        |        |
|         | p value        | 0.0025   | 0.0025  | 0.0196 | 0.0196 | 0.0070 | 0.0550 |        |        |        |
| BS      | Spearman Corr. | 0.627    | 0.627   | 0.643  | 0.643  | 0.643  | 0.449  | 0.578  |        |        |
|         | p value        | 0.2576   | 0.2576  | 0.2416 | 0.2416 | 0.2416 | 0.4486 | 0.3070 |        |        |
| HS      | Spearman Corr. | 0.854    | 0.919   | 0.838  | 0.838  | 0.838  | 0.838  | 0.838  | 0.870  |        |
|         | p value        | 0.0654   | 0.0274  | 0.0765 | 0.0765 | 0.0765 | 0.0765 | 0.0765 | 0.0550 |        |
| EHS     | Spearman Corr. | 0.676    | 0.927   | 0.676  | 0.586  | 0.700  | 0.749  | 0.732  | 0.570  | 0.846  |
|         | p value        | 0.2106   | 0.0274  | 0.2106 | 0.2986 | 0.1881 | 0.1454 | 0.1593 | 0.3155 | 0.0709 |

**Table S19** Spearman correlation coefficients of organic UV filters in Downstream samples

|         |                | S1 (n=5) |         |        |        |        |        |        |        |        |
|---------|----------------|----------|---------|--------|--------|--------|--------|--------|--------|--------|
|         |                | BP-2     | 234THBP | 4HBP   | BP-1   | BP-8   | BP-3   | BP-10  | BS     | HS     |
| 234THBP | Spearman Corr. | 0.805    |         |        |        |        |        |        |        |        |
|         | p value        | 0.1000   |         |        |        |        |        |        |        |        |
| 4HBP    | Spearman Corr. | 0.805    | 0.773   |        |        |        |        |        |        |        |
|         | p value        | 0.1000   | 0.1253  |        |        |        |        |        |        |        |
| BP-1    | Spearman Corr. | 0.968    | 0.773   | 1.000  |        |        |        |        |        |        |
|         | p value        | 0.0070   | 0.1253  | 0.0000 |        |        |        |        |        |        |
| BP-8    | Spearman Corr. | 1.000    | 0.805   | 0.968  | 0.968  |        |        |        |        |        |
|         | p value        | 0.0000   | 0.1000  | 0.0070 | 0.0070 |        |        |        |        |        |
| BP-3    | Spearman Corr. | 0.903    | 0.903   | 0.968  | 0.968  | 0.903  |        |        |        |        |
|         | p value        | 0.0359   | 0.7000  | 0.0070 | 0.0070 | 0.0359 |        |        |        |        |
| BP-10   | Spearman Corr. | 0.903    | 0.903   | 0.968  | 0.968  | 0.903  | 0.935  |        |        |        |
|         | p value        | 0.0359   | 0.0359  | 0.0070 | 0.0070 | 0.0359 | 0.0196 |        |        |        |
| BS      | Spearman Corr. | 0.481    | 0.481   | 0.578  | 0.578  | 0.481  | 0.643  | 0.676  |        |        |
|         | p value        | 0.4120   | 0.4120  | 0.3070 | 0.3070 | 0.4120 | 0.2416 | 0.2106 |        |        |
| HS      | Spearman Corr. | 0.757    | 0.838   | 0.676  | 0.676  | 0.757  | 0.595  | 0.676  | 0.708  |        |
|         | p value        | 0.1386   | 0.0765  | 0.2106 | 0.2106 | 0.1386 | 0.2903 | 0.2106 | 0.1808 |        |
| EHS     | Spearman Corr. | 0.481    | 0.676   | 0.481  | 0.449  | 0.481  | 0.384  | 0.514  | 0.805  | 0.919  |
|         | p value        | 0.4120   | 0.0765  | 0.4120 | 0.4486 | 0.4120 | 0.5236 | 0.3762 | 0.1000 | 0.0274 |

**Table S20** The environmental risk assessment of UV filters in effluent from WWTPs

|         | Effluents |                           |                        |          |     |        |      |        |
|---------|-----------|---------------------------|------------------------|----------|-----|--------|------|--------|
|         | Toxicity  | Species                   | NOEC (ng/L)            | MEC ng/L | AF  | PNEC   | RQ   | ER     |
| BP-2    | Chronic   | <i>Fish (P. promelas)</i> | 8783                   | 24       | 100 | 87.83  | 0.27 | MEDIUM |
| 234THBP | Chronic   | <i>Daphia magna</i>       | 29.4 x 10 <sup>6</sup> | 42       | 100 | 294000 | 0.00 | LOW    |
| 4HBP    | Chronic   |                           |                        | 78       | 100 | 0      |      |        |
| BP-1    | Chronic   | <i>Fish (P. promelas)</i> | 4919                   | 181      | 100 | 49.19  | 3.68 | HIGH   |
| BP-8    | Chronic   | <i>Freshwater algae</i>   | 471 x 10 <sup>3</sup>  | 37       | 100 | 4710   | 0.01 | LOW    |
| BP-3    | Chronic   | <i>Daphia magna</i>       | 180 x 10 <sup>3</sup>  | 23       | 100 | 1800   | 0.01 | LOW    |
| BP-10   | Chronic   |                           |                        | 16       | 100 |        |      |        |
| BS      | Chronic   | <i>Daphia magna</i>       | 894 x 10 <sup>3</sup>  | 19       | 100 | 8940   | 0.00 | LOW    |
| HS      | Chronic   | <i>Daphia magna</i>       | 8.9 x 10 <sup>3</sup>  | 51       | 100 | 89     | 0.57 | MEDIUM |
| EHS     | Chronic   | <i>Freshwater algae</i>   | 11 x 10 <sup>3</sup>   | 219      | 100 | 110    | 1.99 | HIGH   |

**Table S21** The environmental risk assessment of UV filters in samples collected upstream the WWTPs

|         | Upstream |                           |                        |          |     |        |      |      |
|---------|----------|---------------------------|------------------------|----------|-----|--------|------|------|
|         | Toxicity | Species                   | NOEC (ng/L)            | MEC ng/L | AF  | PNEC   | RQ   | ER   |
| BP-2    | Chronic  | <i>Fish (P. promelas)</i> | 8783                   | 11       | 100 | 87.83  | 0.12 | LOW  |
| 234THBP | Chronic  | <i>Fish (P. promelas)</i> | 29.4 x 10 <sup>6</sup> | 40       | 100 | 294000 | 0.00 | LOW  |
| 4HBP    | Chronic  | <i>Daphia magna</i>       |                        | 45       | 100 | 0      |      |      |
| BP-1    | Chronic  |                           | 4919                   | 79       | 100 | 49.19  | 1.60 | HIGH |
| BP-8    | Chronic  | <i>Fish (P. promelas)</i> | 471 x 10 <sup>3</sup>  | 60       | 100 | 4710   | 0.01 | LOW  |
| BP-3    | Chronic  | <i>Daphia magna</i>       | 180 x 10 <sup>3</sup>  | 52       | 100 | 1800   | 0.03 | LOW  |
| BP-10   | Chronic  |                           |                        | 10       | 100 | 0      |      |      |
| BS      | Chronic  | <i>Daphia magna</i>       | 894 x 10 <sup>3</sup>  | 2        | 100 | 8940   | 0.00 | LOW  |
| HS      | Chronic  | <i>Daphia magna</i>       | 8.9 x 10 <sup>3</sup>  | 0        | 100 | 89     | 0.00 | LOW  |
| EHS     | Chronic  | <i>Daphia magna</i>       | 11 x 10 <sup>3</sup>   | 175      | 100 | 110    | 1.60 | HIGH |

**Table S22** The environmental risk assessment of UV filters in samples collected downstream the WWTPs

|         | Downstream |                           |                        |          |     |        |      |        |
|---------|------------|---------------------------|------------------------|----------|-----|--------|------|--------|
|         | Toxicity   | Species                   | NOEC (ng/L)            | MEC ng/L | AF  | PNEC   | RQ   | ER     |
| BP-2    | Chronic    | <i>Fish (P. promelas)</i> | 8783                   | 28       | 100 | 87.83  | 0.32 | MEDIUM |
| 234THBP | Chronic    | <i>Daphia magna</i>       | 29.4 x 10 <sup>6</sup> | 19       | 100 | 294000 | 0.00 | LOW    |
| 4HBP    | Chronic    |                           |                        | 159      | 100 | 0      |      |        |
| BP-1    | Chronic    | <i>Fish (P. promelas)</i> | 4919                   | 206      | 100 | 49.19  | 4.19 | HIGH   |
| BP-8    | Chronic    | <i>Freshwater algae</i>   | 471 x 10 <sup>3</sup>  | 108      | 100 | 4710   | 0.02 | LOW    |
| BP-3    | Chronic    | <i>Daphia magna</i>       | 180 x 10 <sup>3</sup>  | 19       | 100 | 1800   | 0.01 | LOW    |
| BP-10   | Chronic    |                           |                        | 17       | 100 | 0      |      |        |
| BS      | Chronic    | <i>Daphia magna</i>       | 894 x 10 <sup>3</sup>  | 9        | 100 | 8940   | 0.00 | LOW    |
| HS      | Chronic    | <i>Daphia magna</i>       | 8.9 x 10 <sup>3</sup>  | 14       | 100 | 89     | 0.16 | MEDIUM |
| EHS     | Chronic    | <i>Freshwater algae</i>   | 11 x 10 <sup>3</sup>   | 139      | 100 | 110    | 1.27 | HIGH   |

## References

1. F. L. Chiriac, I. Paun, F. Pirvu, L. F. Pascu, T. Galaon, Rev. Chim. (Bucharest), 2020, **71**, 92.
